# Supplementary material for: The arsenic-lowering effect of inulin-type prebiotics in end-stage renal disease: a randomized crossover trial
Source: Royal Society of Chemistry journal article supplement (doi:10.1039/d3fo01843a), 2023-11-30
Supplement: d3fo01843a1.pdf [file d3fo01843a1.pdf]

## **The arsenic-lowering effect of Inulin type prebiotics in end stage renal disease: a randomized crossover trial**

### **Supplemental materials**

**Supplementary table 1** Comparison of basic characteristics and biochemistry parameters between patients included in the final analysis and patients excluded.

**Supplementary table 2** The comparison of the baseline values of plasma trace elements between the two intervention sequences and between prebiotics-pre and placebo-pre.

**Supplementary Figure 1** The association of As plasma concentration with daily clearance rate by urine, dialysate and feces. A, the repeated-measures correlation between plasma As and urinary As excretion rate; B, the repeated-measures correlation between plasma As and dialysate As clearance rate; C, the repeated-measures correlation between plasma As and total As removal rate; D, the repeated-measures correlation between plasma As and fecal As content. For the repeated-measures correlation, observations from the same participant were shown in the same color, with corresponding lines to show the repeated-measures correlation fit for each participant, rm, correlation coefficient of repeated measures.

**Supplementary table 1** Comparison of basic characteristics and biochemistry parameters between patients included in the final analysis and patients excluded <sup>1</sup>.

| <b>Variables</b>                                         | <b>Included in analysis<br/>(n=29)</b> | <b>Lost follow-up / samples<br/>unavailable (n=15)</b> | <b>P <sup>2</sup></b> |
|----------------------------------------------------------|----------------------------------------|--------------------------------------------------------|-----------------------|
| Age, years                                               | 39.72 ± 12.23                          | 37.95 ± 12.58                                          | 0.655                 |
| Sex, male / female                                       | 15 / 14                                | 5 / 10                                                 | 0.246                 |
| BMI, kg/m <sup>2</sup>                                   | 20.76 ± 3.02                           | 20.89 ± 2.22                                           | 0.885                 |
| ESRD Course, month                                       | 23.67 (16.87-54.69)                    | 31.89 (13.43-56.15)                                    | 0.967                 |
| PD Course, month                                         | 18.84 (12.20-42.26)                    | 13.61 (4.03-23.69)                                     | 0.075                 |
| Urine volume, mL/24h                                     | 0.33 (0.02-0.73)                       | 0.68 (0.15-1.43)                                       | 0.142                 |
| Daily dialysate influent, L/24h                          | 8.00 (6.00-8.00)                       | 8.00 (6.00-8.00)                                       | 0.709                 |
| 1.5% Glucose dialysate, L/24h                            | 8.00 (6.00-8.00)                       | 8.00 (6.00-8.00)                                       | 0.287                 |
| Daily ultrafiltration, mL/24h                            | 350.00 (75.00-487.50)                  | 222.50 (-253.75-455.00)                                | 0.287                 |
| Spent dialysate, L/24h                                   | 8.36 (6.27-8.85)                       | 7.74 (6.41-8.64)                                       | 0.350                 |
| Serum albumin, g/L                                       | 39.45 ± 3.54                           | 39.11 ± 6.32                                           | 0.817                 |
| Serum prealbumin, mg/L                                   | 401.34 ± 68.08                         | 419.69 ± 81.01                                         | 0.493                 |
| Serum hemoglobin, g/L                                    | 103.28 ± 20.31                         | 100.20 ± 20.46                                         | 0.637                 |
| BUN, mmol/L                                              | 18.15 ± 4.45                           | 16.83 ± 4.67                                           | 0.364                 |
| Serum creatinine, µmol/L                                 | 998.24 ± 311.65                        | 870.40 ± 290.18                                        | 0.194                 |
| Serum HCO <sub>3</sub> , mmol/L                          | 24.86 ± 2.58                           | 25.62 ± 3.56                                           | 0.420                 |
| Residual GFR, mL·min <sup>-1</sup> ·1.73 m <sup>-2</sup> | 4.40 (3.30-5.60)                       | 4.60 (4.00-5.80)                                       | 0.304                 |
| SBP, mmHg                                                | 144.93 ± 25.15                         | 153.64 ± 17.72                                         | 0.252                 |
| DBP, mmHg                                                | 87.07 ± 15.52                          | 95.14 ± 11.97                                          | 0.094                 |
| FBG, mmol/L                                              | 5.33 (5.03-5.66)                       | 5.17 (4.88-5.72)                                       | 0.468                 |
| Plasma TG, mmol/L                                        | 1.41 (1.18-1.97)                       | 1.98 (1.64-2.20)                                       | 0.024                 |
| Plasma TC, mmol/L                                        | 4.36 ± 0.96                            | 4.56 ± 1.42                                            | 0.591                 |
| Plasma LDL-C, mmol/L                                     | 2.33 ± 0.67                            | 2.53 ± 1.07                                            | 0.467                 |
| Plasma HDL-C, mmol/L                                     | 1.02 (0.84-1.26)                       | 1.06 (0.80-1.42)                                       | 0.951                 |
| Serum hs-CRP, mg/L                                       | 1.15 (0.60-4.60)                       | 0.60 (0.30-1.45)                                       | 0.081                 |
| Kt/v                                                     | 1.96 (1.73-2.36)                       | 1.98 (1.66-2.38)                                       | 0.631                 |
| Ccr, L·wk <sup>-1</sup> ·1.73 m <sup>-2</sup>            | 56.49 (48.51-71.09)                    | 57.86 (45.83-71.76)                                    | 0.852                 |
| nPNA, g/kg'd                                             | 0.95 ± 0.17                            | 0.92 ± 0.16                                            | 0.618                 |
| nPCR, g/kg'd                                             | 1.19 ± 0.29                            | 1.08 ± 0.18                                            | 0.150                 |

<sup>1</sup> Values are presented as means ±SDs or medians (IQRs).

<sup>2</sup> P values were calculated by independent-sample *t* test or Mann–Whitney *U* test.

ESRD, end stage renal disease; PD, peritoneal dialysis; BUN, blood urea nitrogen; rGFR, residual glomerular filtration rate; CCr, creatinine clearance rate; Kt/V, dialysis efficiency; nPNA, normalized protein nitrogen appearance; nPCR, normalized protein catabolic rate; SBP, systolic blood pressure; DBP, diastolic blood pressure; FBG, fasting blood-glucose; hs-CRP, hypersensitive C-reactive protein.

**Supplementary table 2** The comparison of the baseline values of plasma trace elements between the two intervention sequences and between prebiotics-pre and placebo-pre.

| Trace elements  | Prebiotics to placebo<br>(n=16) | Placebo to prebiotics<br>(n=13) | <i>P</i> <sup>1</sup> | Prebiotics-pre<br>(n=23) | Placebo-pre<br>(n=23)   | <i>P</i> <sup>2</sup> |
|-----------------|---------------------------------|---------------------------------|-----------------------|--------------------------|-------------------------|-----------------------|
| Serum Mn, µg/L  | 0.57 (0.47-0.66)                | 0.44 (0.33-0.61)                | 0.223                 | 0.58 (0.42-0.66)         | 0.48 (0.36-0.65)        | 0.316                 |
| Serum Fe, µg/L  | 682.62 (546.87-905.22)          | 904.27 (680.90-1022.56)         | 0.174                 | 688.82 (541.15-922.17)   | 800.80 (640.93-928.04)  | 0.121                 |
| Serum Co, µg/L  | 0.33 (0.28-0.51)                | 0.27 (0.23-0.38)                | 0.121                 | 0.33 (0.26-0.54)         | 0.29 (0.24-0.52)        | 0.831                 |
| Serum Cu, µg/L  | 878.64 (803.59-1023.09)         | 883.46 (798.81-1058.36)         | 0.873                 | 879.66 (821.13-1012.59)  | 915.31 (821.13-1038.89) | 0.976                 |
| Serum Zn, µg/L  | 737.41 (603.67-764.31)          | 721.09 (600.07-862.74)          | 0.873                 | 738.61 (595.00-773.49)   | 729.36 (590.34-837.11)  | 0.738                 |
| Serum Se, µg/L  | 68.93 (53.86-78.01)             | 59.93 (52.11-70.86)             | 0.302                 | 65.00 (51.95-77.29)      | 60.72 (52.71-69.59)     | 0.394                 |
| Serum Sr, µg/L  | 51.88 (47.97-66.21)             | 57.11 (43.44-69.80)             | 0.698                 | 51.65 (48.63-69.02)      | 57.14 (46.97-70.15)     | 0.584                 |
| Serum Mo, µg/L  | 14.77 (9.19-17.77)              | 10.56 (8.88-13.55)              | 0.189                 | 13.98 (8.49-17.54)       | 10.89 (9.04-13.75)      | 0.274                 |
| Plasma Cr, µg/L | 3.58 (2.10-4.73)                | 2.85 (1.47-4.78)                | 0.507                 | 3.61 (2.02-4.60)         | 3.56 (2.30-4.79)        | 0.903                 |
| Plasma V, µg/L  | 0.26 (0.17-0.41)                | 0.23 (0.18-0.35)                | 0.599                 | 0.24 (0.17-0.35)         | 0.24 (0.18-0.36)        | 0.715                 |
| Plasma Ni, µg/L | 0.21 (0.13-5.36)                | 1.27 (0.13-7.45)                | 0.664                 | 0.13 (0.13-5.54)         | 1.00 (0.13-6.05)        | 1.000                 |
| Plasma As, µg/L | 3.55 (2.79-4.18)                | 3.50 (1.88-4.84)                | 0.873                 | 3.38 (2.76-3.92)         | 3.63 (2.31-4.85)        | 0.465                 |
| Plasma Cd, µg/L | 0.08 (0.04-0.10)                | 0.07 (0.02-0.09)                | 0.537                 | 0.08 (0.04-0.11)         | 0.08 (0.04-0.11)        | 0.447                 |
| Plasma Pb, µg/L | 0.25 (0.14-0.30)                | 0.27 (0.13-0.35)                | 0.873                 | 0.25 (0.15-0.30)         | 0.26 (0.14-0.37)        | 0.976                 |
| Plasma Ba, µg/L | 11.09 (8.68-13.45)              | 11.27 (5.41-13.69)              | 0.873                 | 10.08 (7.11-13.60)       | 10.59 (1.48-12.10)      | 0.855                 |
| Plasma Tl, µg/L | 0.06 (0.04-0.07)                | 0.06 (0.03-0.08)                | 0.982                 | 0.06 (0.03-0.07)         | 0.06 (0.03-0.08)        | 0.855                 |

Supplementary table 2 continued.

| Trace elements  | Prebiotics to placebo<br>(n=16) | Placebo to prebiotics<br>(n=13) | <i>P</i> <sup>1</sup> | Prebiotics-pre<br>(n=23) | Placebo-pre<br>(n=23) | <i>P</i> <sup>2</sup> |
|-----------------|---------------------------------|---------------------------------|-----------------------|--------------------------|-----------------------|-----------------------|
| Plasma Th, µg/L | 0.08 (0.04-0.17)                | 0.07 (0.04-0.14)                | 0.767                 | 0.05 (0.03-0.16)         | 0.05 (0.04-0.08)      | 0.412                 |
| Plasma U, µg/L  | 0.01 (0.01-0.01)                | 0.01 (0.01-0.01)                | 0.205                 | 0.01 (0.01-0.01)         | 0.01 (0.01-0.01)      | 0.330                 |

<sup>1</sup> *p* values were calculated by two independent-sample Mann–Whitney *U* test.

<sup>2</sup> *p* values were calculated by two related-sample Friedman test.

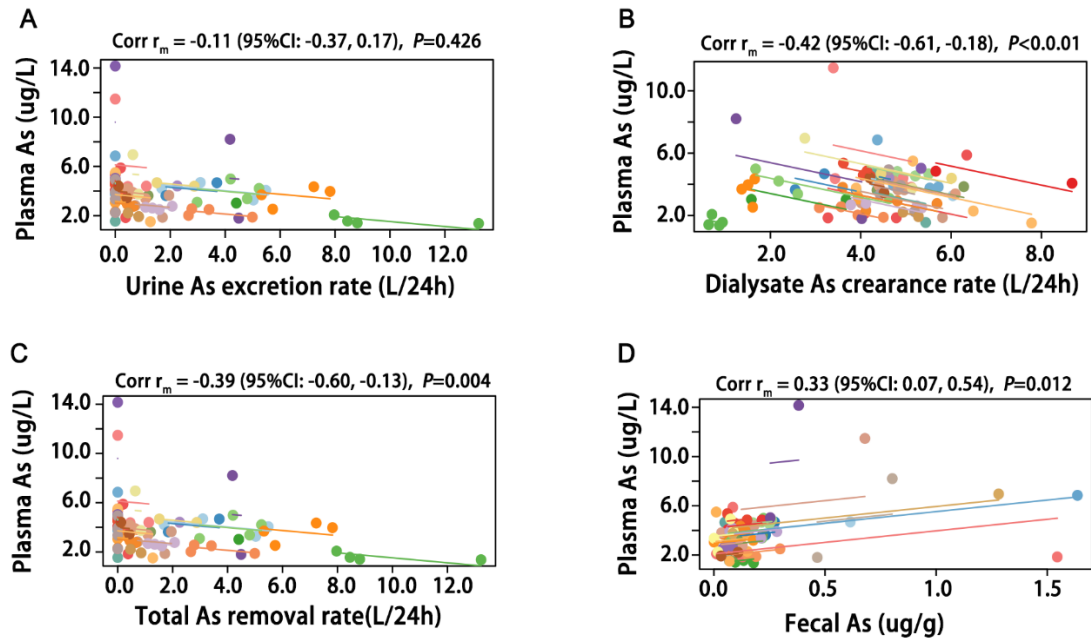

**Supplementary Figure 1** The association of As plasma concentration with the daily clearance rate by urine, dialysate and feces.
